## 1 Short title

2 Automatic metabolite classification

## 3 Author for Contact details

4 Marcos Egea-Cortines

## 5 Article title

6 Automatic classification of constitutive and non-constitutive metabolites with  
7 gcProfileMakeR

## 8 All author names and affiliations

9 Pérez-Sanz, Fernando<sup>1</sup>; Ruiz-Hernández, Victoria<sup>1</sup>; Marta Isabel Terry<sup>1</sup>; Arce-Gallego,  
10 Sara<sup>1</sup>; Weiss, Julia<sup>1</sup>; Navarro Pedro J<sup>2</sup> and Egea-Cortines, Marcos<sup>1</sup>

11 <sup>1</sup>Genética Molecular, Instituto de Biotecnología Vegetal, Edificio I+D+I, Plaza del Hospital s/n, Universidad  
12 Politécnica de Cartagena 30202, Cartagena, Spain., <sup>2</sup> DSIE Cuartel de Antiguones, Plaza del Hospital s/n,  
13 Universidad Politécnica de Cartagena 30202, Cartagena, Spain.

14 VR-H and FP-S Contributed equally to this work

## 15 One sentence summary

16 gcProfileMakeR allows the automatic annotation of the core metabolome and non-  
17 constitutive metabolites, increasing speed and accuracy of non-targeted metabolomics.

## 18 List of author contributions

19 V.R-H, S.A.G, P.J.N, F.P.S and M.E-C conceived the software; F.P-S, V.R-H and  
20 M.E-C conceived the original screening and research plans; F.P-S, S.A-G, and P.J.N  
21 coded the application; V.R-H, M.I.T, S.A-G, J.W, and M.E-C performed the

22 experiments and analysed the data; V.R-H, M.I.T, J.W and M.E-C. wrote the  
23 manuscript. All authors corrected the manuscript. JW, ME-C and PJN wrote the grant  
24 applications. M.E-C. agrees to serve as the author responsible for contact and ensures  
25 communication. F.P-S and V.R-H contributed equally to this work.

## 26 **Funding information**

27 This work was supported by the Ministerio de Economía Industria y Competitividad  
28 [BFU2017-88300-C2-1R] to [MEC] [JW], [BFU2017-88300-C2-2R] to [PJN];  
29 Fundación Séneca [19398/PI/14] to [MEC] and PhD grant by the Ministerio de  
30 Educación Cultura y Deporte [FPU13/03606] to [VRH].

## 31 **Present addresses (if any)**

32 VRH Department of Biosciences, University Salzburg, 5020 Salzburg, Austria.

33 SAG Vall d'Hebron Institute of Oncology, 08035 Barcelona, Spain.

## 34 **Email address of Author for Contact**

35 [marcos.egea@upct.es](mailto:marcos.egea@upct.es)

## 36 Abstract (250 word max)

37 Data analysis in non-targeted metabolomics is extremely time consuming. Genetic  
38 factors and environmental cues affect the composition and quantity of present  
39 metabolites i.e. the constitutive and non-constitutive metabolites. We developed  
40 gcProfileMakeR, an R package that uses standard output files from GC-MS for  
41 automatic data analysis using CAS numbers. gcProfileMakeR produces three outputs: a  
42 core or constitutive metabolome, a second list of compounds with high quality matches  
43 that is non-constitutive and a third set of compounds with low quality matching to MS  
44 libraries. As a proof of concept, we defined the floral scent emission of *Antirrhinum*  
45 *majus* using wild type plants, the floral identity mutants *deficiens* and *compacta* as well  
46 as RNAi lines of *AmLHY*. Loss of petal identity was accompanied by appearance of  
47 aldehydes typical of green leaf volatile profiles. Decreased levels of *AmLHY* caused a  
48 major increase in volatile complexity, and activated the synthesis of benzyl acetate,  
49 absent in WT. Furthermore, some volatiles emitted in a gated fashion in WT such as  
50 methyl 3,5-dimethoxybenzoate or linalool became constitutive. Using sixteen volatiles of  
51 the constitutive profile, all genotypes were classified by Machine Learning with 0%  
52 error. gcProfileMakeR may thus help define core and pan-metabolomes. It enhances the  
53 quality of data reported in metabolomic profiles as text outputs rely on CAS numbers.  
54 This is especially important for FAIR data implementation.

55

## 56 Introduction

57 Plants, bacteria and animals emit complex mixtures of Volatile Organic Compounds  
58 (VOCs) forming blends or scent profiles. The chemodiversity of plant scent profiles is  
59 enormous as the last list of compounds published classifies over 1700 compounds  
60 (Knudsen et al., 2006). The variety of combinations in terms of quality and quantity of  
61 VOCs make many scent profiles unique for a species, or variety.

62 The structure of a scent profile is determined by a combination of three factors. First,  
63 developmental processes underlie the structure of a scent profile, as leaves, roots,  
64 flowers or fruits of a given plant emit distinct combinations of VOCs. Second,  
65 environmental conditions modify scent emission. For instance, some VOCs are  
66 typically produced under pathogen attacks (Kessler and Baldwin, 2002; Shimoda et al.,  
67 2012; Groen et al., 2016) and scent emission is affected by temperature and circadian  
68 regulation (Kolossova et al., 2001; Cna'ani et al., 2014; Terry et al., 2019a). Finally,  
69 genetic diversity plays a key role as many species, varieties and mutants emit differing  
70 scent profiles. Scent profiles can be used to identify species as it is a stable character  
71 and the major VOCs emitted tend to be a shortlist of metabolites (Knudsen et al., 2006;  
72 Raguso et al., 2006; Weiss et al., 2016a).

73 Whilst core scents are formed by a given blend of VOCs and are typical of a species or  
74 an organ, volatiles emitted in a non-constitutive way may play important biological  
75 roles. Thus, the combination of genetic diversity, morphogenesis and environmental  
76 cues, can make challenging the unequivocal determination of a scent profile emitted by  
77 a species, an organ, or under certain environmental conditions.

78 Reaching a consensus among samples of which compounds are comprising the  
79 constitutive metabolomic profile and which form the non-constitutive metabolome or  
80 discriminate between two sets of samples is mainly done manually. This causes two

81 major problems, first, criteria are not always obvious or consistent and second, the  
82 procedure is extremely tedious, time consuming and prone to error. Sample size is key  
83 to determine accurately metabolic profiles. However, due to the difficulties found in  
84 data processing, sample size increment ( $n \geq 5$ ) is neglected in many studies. An  
85 additional issue is the complexity of names given to a single chemical compound. In  
86 many cases, they include a common name, a chemical structure and sometimes isomers.  
87 The Chemical Abstract Service Number or CAS number is a single identifier that allows  
88 unambiguous assignation of a chemical structure. Thus the adoption of CAS-number  
89 defined metabolomes is the most appropriate way to produce metabolomics raw data in  
90 a suitable format for FAIR data management where data can be reanalysed (Wilkinson  
91 et al., 2016).

92

93 Here we provide an R-package that uses as inputs spreadsheet files produced by GC-MS  
94 apparatus to determine the core metabolome and non-constitutive compounds emitted  
95 by a set of samples. It compares between samples to give a set of common and  
96 differential set of metabolites in an automatic fashion.

97 We demonstrate the utility of `gcProfileMakeR` by analysing two genotypes of  
98 *Antirrhinum majus* affecting petal identity (Bey et al., 2004; Manchado-Rojo et al.,  
99 2012). Furthermore, we analysed the complete scent emission profile of *A.majus* lines  
100 with downregulated levels of *AmLHY* (Terry et al., 2019b). Our results indicate that the  
101 organ identity gene *deficiens* (Sommer et al., 1990), required to establish a petal organ  
102 identity, has a major impact in the scent profile emitted by the flowers, that result in  
103 scent profiles more similar to vegetative tissues. The downregulation of *AmLHY* causes  
104 among other features the appearance of volatiles undetected in the wild type plants,  
105 indicating a major coordination of scent emission by *AmLHY*. Using Machine Learning,

106 we were able to classify the constitutive scent profiles of four genotypes with 0% error  
107 suggesting a great potential of gcProfileMakeR for downstream bioinformatics  
108 processing of metabolomic data.

109

## 110 Results and Discussion

111

112 The full implementation of non-targeted metabolomics can give as a result a very large  
113 lists of liquid and/or gas chromatograms comprising hundreds of compounds (Zhu et al.,  
114 2018). Oftentimes, the number of compounds described undergo an arbitrary cut-off as  
115 major and minor components. The second reason to define only a subset of metabolites  
116 is that the comparison between samples is performed manually. We developed  
117 gcProfileMakeR, a tool accelerating the actual identification of common compounds in  
118 a set of samples. It uses reproducible criteria for downstream processing and data  
119 reusability. gcProfileMakeR was developed as an R package as R is open source, and  
120 the scientific community, especially biology, is doing a massive use of it.  
121 gcProfileMakeR determines the core metabolome and non-constitutive compounds  
122 present in a set of samples, thus allowing extensive exploration.

123

### 124 **gcProfileMakeR workflow**

125 gcProfileMakeR uses two types of raw data: either XLS data files obtained directly  
126 from Agilent Chemstation software (Library Search Report) or CSV files (Fig. 1A). An  
127 example dataset can be retrieved within the library.

128 GC basic data contains information for each integrated peak about retention time (RT)  
129 and area of the peak. Mass spectra alignment with available libraries (MS libraries)

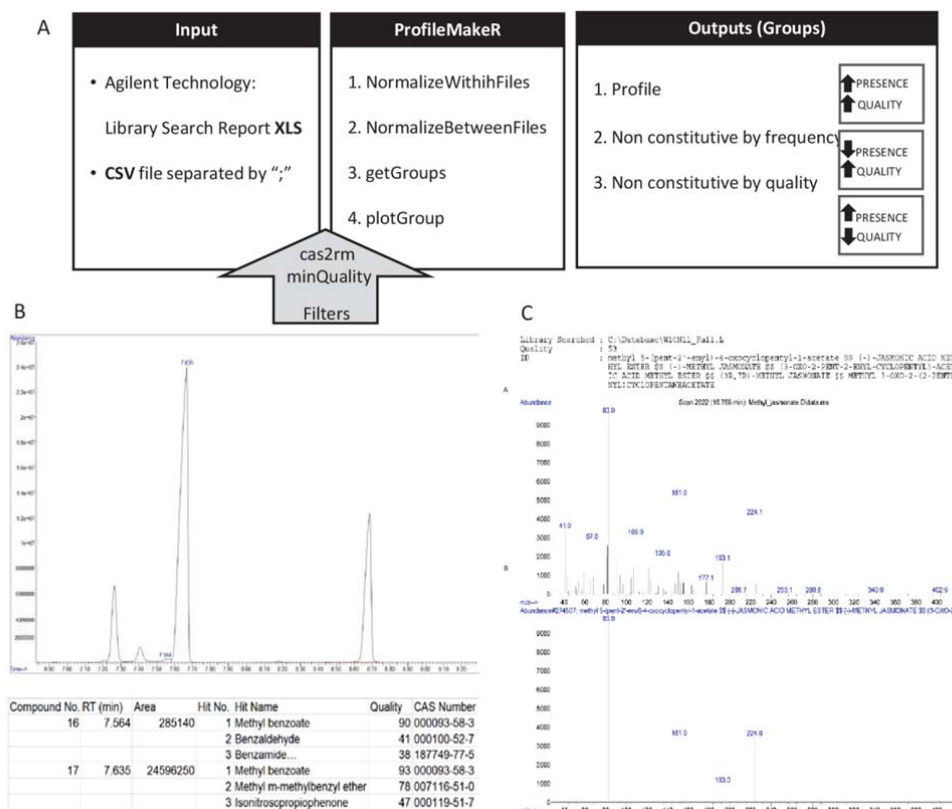

Figure 1. (A) gcProfileMakeR pipeline. This library accepts Excel (.xls) and .csv files as input data. The first function, NormalizeWithinFiles, reads the data and groups compounds with similar retention time (RT) and common CAS numbers. Users also can apply two filters: cas2rm (compound/s to exclude) and minQuality (minimum quality). NormalizeBetweenFiles groups compounds with similar RT in all files, with the most representative CAS number. getGroups determines the constitutive and non-constitutive profiles (i.e. volatile profile) by frequency and quality, which are choose by the user. Finally, plotGroup graphs the constitutive, non-constitutive by frequency and/or non-constitutive profile by quality. (B) A standard chromatogram where two close peaks are integrated separately by default and dataset corresponding to peaks, where the identity with highest probability of the peaks is the same, methyl benzoate (CAS number 93-58-3). (C) Mass spectra of methyl jasmonate(CAS No: 39924-52-2), a commercial standard (upper panel) and mass spectral database (lower panel)Willey10th-NIST11b.

130 allows to identify the compounds present in the sample with a certain degree of  
 131 confidence (quality). Annotated compounds (hits) are listed according to the quality of  
 132 the match between the mass spectra obtained and the mass spectra listed in the MS  
 133 library. Hits are specified by chemical names of compounds and the CAS Registry  
 134 Number associated to the hit/compound. CAS numbers are specific for a compound  
 135 whereas chemical names are redundant and may imply different isomers or molecules.  
 136 gcProfileMakeR works with RT, qualities and CAS numbers in order to provide lists of

137 compounds identified by CAS numbers, areas and qualities. Chemical names are linked  
138 to the CAS numbers as they are understandable by scientists.

139 Two filters can be applied to pretreat data (Fig. 1A). The first one, `cas2rm`, will sort out  
140 any CAS number defined by the user, thus allowing the elimination of known  
141 contaminants, or compounds that are ubiquitous and complicate further analysis. The  
142 second filter, `minQuality`, eliminates hits, either first or secondary, with a quality below  
143 a defined level. It could leave retention times empty if being too strict (e.g. = 95). It  
144 allows to use a strategy of low strictness at the integration step and explore the data,  
145 decreasing the threshold to define a complete metabolome.

146 `gcProfileMakeR` uses three functions (Fig. 1A). The first function  
147 `NormalizeWithinFiles`, analyses each file/sample assigning for each retention time a set  
148 of possible hits (compounds). Peak areas of the same compounds with an identical CAS  
149 number found in different RTs, will be added (Fig. 1B). The second function  
150 `NormalizeBetweenFiles`, reaches a consensus between files in such a way that the same  
151 compounds separated in relatively close retention times are grouped together. The third  
152 function `getGroups`, establishes what is considered as “Profile”, “Non-constitutive by  
153 Frequency” and “Non-constitutive by Quality”. The rationale behind including a Non-  
154 constitutive by Quality list is that some compounds, even as chemical standards, give  
155 low quality due to poor representation in MS libraries, for instance methyl jasmonate  
156 (Fig. 1C). Frequency and quality default thresholds can be adjusted, thus allowing data  
157 exploration.

158 Default values have been tested with different sets of samples and number of samples  
159 and have proved the best outputs when compared to manual annotation (data not  
160 shown). The output of `gcProfilemakeR` are three mutually exclusive lists of  
161 compounds. The first set of compounds listed as “Profile” are those compounds which



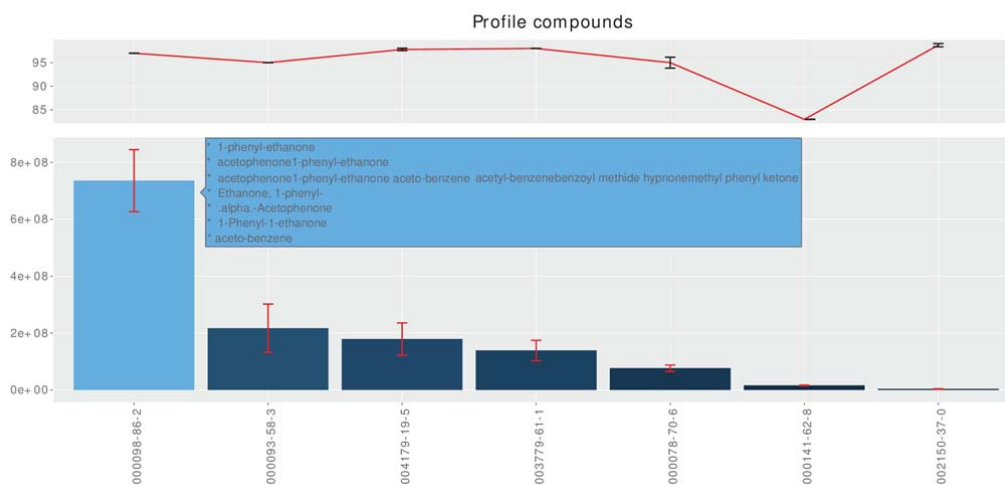

Figure 2. plotGroup function. This graph shows the constitutive profile by frequency of the wild-type snapdragon at ZT3 (*Zeitgeber* time). The x-axis shows the CAS number of volatile organic compounds. The upper part displays the average quality of volatiles (red line) and the lower part of the graph indicates the average areas of compounds (blue bars), that are plotted in decreasing order.

162 appear in all the samples of a given type i.e. genotype and/or treatment and which have  
 163 a high matching quality: above a percentage of samples defined by the researcher.  
 164 Compounds listed as “Non-constitutive by Frequency” are metabolites with a high  
 165 mean-quality score (default: >85%) in the MS analysis but present in less than the

166 percentage of the samples defined previously (Fig. 1A). Finally, compounds listed as  
167 “Non-constitutive by Quality” are metabolites with a low mean-quality (default: <85%)  
168 that are in at least 30% of the samples (default value). Frequency and quality thresholds  
169 can be adjusted for stringency thus allowing data exploration. Results can be plotted  
170 with the function `plotGroup` (Fig 2). In this function, `compoundType` parameter can be  
171 adjusted in order to get profiles (p), non-constitutive by frequency (ncf) or non-  
172 constitutive by quality (ncq). Results are plotted according to the average area and  
173 quality of each compound grouped in each category. The graphic obtained is in HTML  
174 format and allows, by pointing at the columns, to see the actual compound names that  
175 are linked to a CAS number (Fig. 2). Pointing at the quality percentages it shows the  
176 error rates of the quality for a given CAS number. This facilitates working with the  
177 graphics. They can also be saved as .png.

178

### 179 **Testing gcProfileMakeR in floral organ identity mutants and clock transgenic lines**

180 We have experimentally validated `gcProfileMakeR` using a set of *Antirrhinum majus*  
181 mutants, transgenic and wild type plants. Floral scent emission depends on properly  
182 formed petal tissues, as weak alleles of B-function genes such as *deficiens-nicotianoides*  
183 (*def-nic*) (Sommer et al., 1991) or *compacta (co)*, show significant changes in the  
184 quantities of the terpenoids myrcene and ocimene, and the phenylpropanoid methyl  
185 benzoate (Manchado-Rojo et al., 2012). However, the complete scent profile had not  
186 been analysed.

187

188 We analyzed four datasets of floral volatiles, one corresponding to Sippe 50 wild types,  
189 one produced by the mutant *def-nic*, a third corresponding to *co* and a fourth  
190 corresponding to *RNAi:AmLHY*. We used a list of possible contaminants, which might

191 proceed from the twister absorption matrix (Supplemental Table S1), and cas2rm to  
192 eliminate from our results any CAS numbers corresponding to siloxane or related  
193 derivatives.

194 Using gcProfileMakeR allowed to obtain a comprehensive profile present in at least 70  
195 % of the samples (pFreqCutoff= 0.70). The wild type scent profile comprised seven  
196 constitutive VOCs in wild type flowers including benzenoids/phenylpropanoids and  
197 monoterpenes (Fig 3). In contrast, *co* produced only five, losing one benzenoid and one  
198 monoterpene, while it emitted decanal, an aldehyde absent in wild type. The stronger B-  
199 function mutant allele *def-nic* did not emit monoterpenes and had yet increased levels of  
200 aldehydes with presence of nonanal and decanal (Fig. 3). In sharp contrast, the scent  
201 profile of *RNAi:AmLHY* was significantly more complex than the wild type, and it  
202 included a total of fourteen VOCs comprising aldehydes, benzenoids/phenylpropanoids,  
203 mono and sesquiterpenes (Fig. 3).

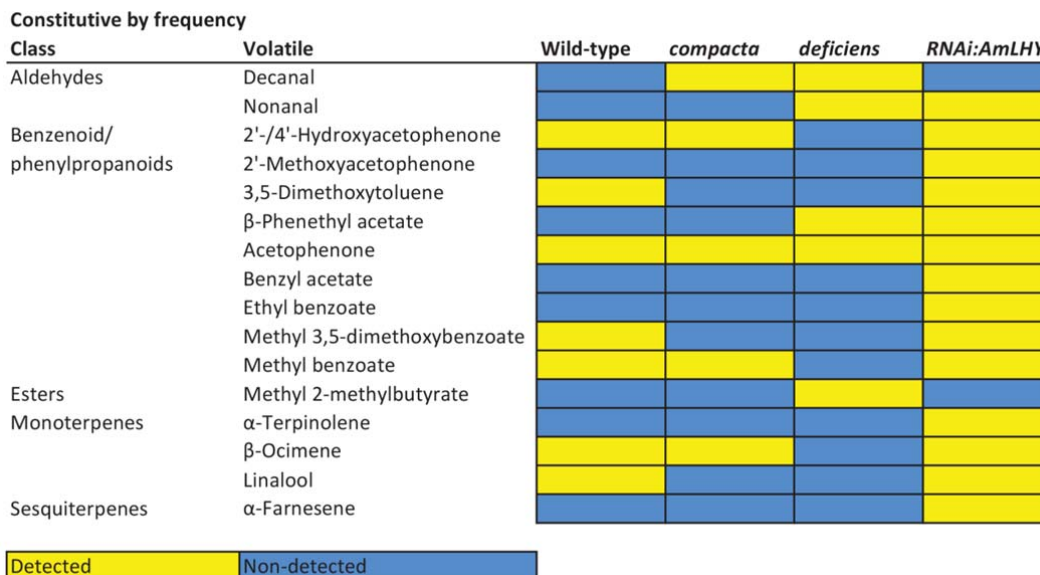

Figure 3. Heat map of constitutive by frequency scent profile of wild-type snapdragon (SIPPE50), the mutants *compacta* and *deficiens-nicotianoides* and the transgenic line *RNAi:AmlHY*. We set minQuality to 80% (NormalizeWithinFiles function). Constitutive profile comprises those compounds that were present on at least the 70% of analyzed samples. Volatile compounds are clustered by class. Yellow and blue colors denote a detected and a non-detected compound, respectively.

204 When we inspected the Non-Constitutive by Frequency VOCs i.e. those found in less  
 205 than 70% of the samples (Fig. 4), we found that wild type flowers emitted an additional  
 206 set of five VOCs comprising the amine indole, benzenoids/phenylpropanoids and  
 207 monoterpenes. In contrast, the number of volatiles emitted as Non-constitutive by  
 208 Frequency by the rest of genotypes was substantially larger. The mutant *co* emitted 38  
 209 additional VOCs in all the categories including cycloalkanes such as cyclododecane,  
 210 esters like borneol acetate, sesquiterpenes such as bornene and alpha-farnesene and  
 211 terpene derivatives such as hexahydrofarnesyl acetone. The weak *def-nic* produced 19  
 212 volatiles while the *RNAi:AmlHY* lines produced 20 additional VOCs. Some of these  
 213 were found only in the *RNAi:AmlHY* lines (see below). The analysis of non-constitutive  
 214 by quality scent profile revealed 21 new volatiles (Supplemental Fig. S1). These  
 215 compounds included aldehydes detected in transgenic lines, such as dodecanal and  
 216 octanal.

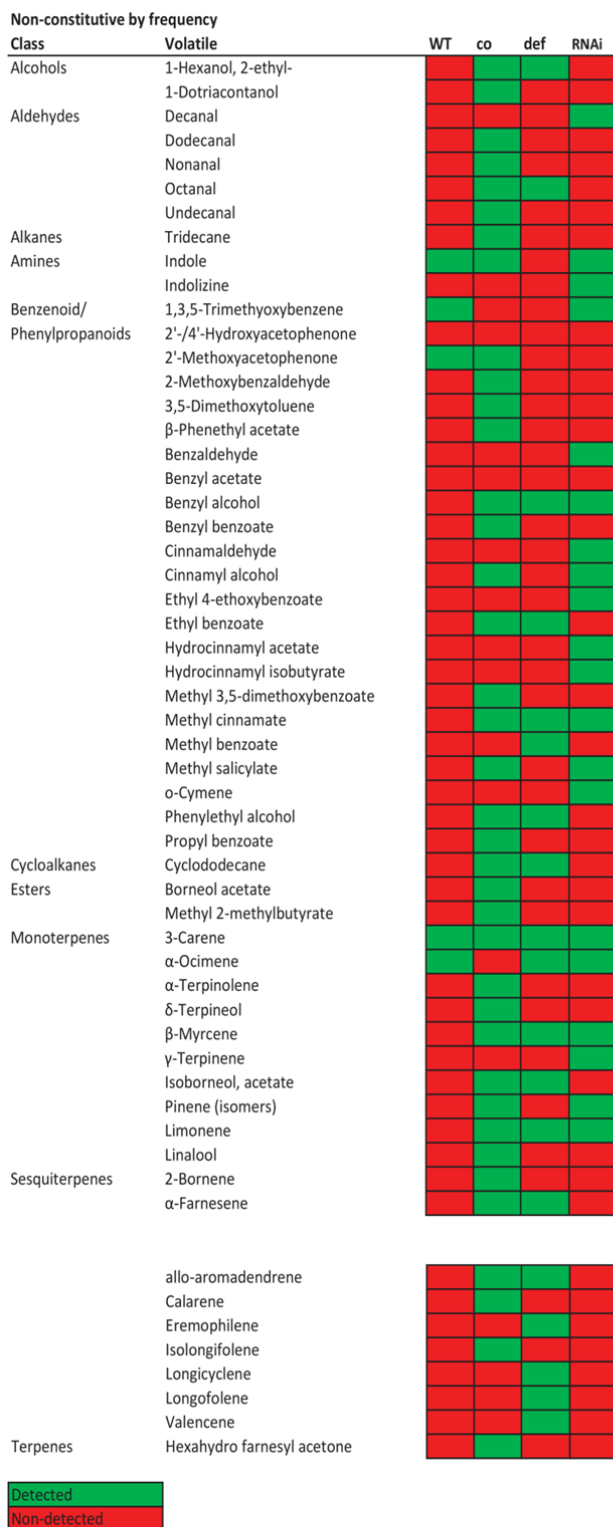

Figure 4. Heat map of non-constitutive by frequency scent profiles of wild-type snapdragon (Sippe 50, WT), the mutants *co* and *def<sup>mic</sup>* and the transgenic line *RNAi:AmlHY (RNAi)*. We set minQuality to 80% (NormalizeWithinFiles function). Non-constitutive profile comprises those compounds that were present on or less than the 30% of analyzed samples. Volatile compounds are clustered by class. Green and red colors indicate a detected and a non-detected compound, respectively.

217 An important outcome of the data analyzed is that the actual genetic capacity of VOC

| Group                      | Volatile                     | Wild-type             |        |      |        | <i>RNAi:AmLHY</i> |        |        |        |
|----------------------------|------------------------------|-----------------------|--------|------|--------|-------------------|--------|--------|--------|
|                            |                              | ZT3                   | ZT9    | ZT15 | ZT21   | ZT3               | ZT9    | ZT15   | ZT21   |
| Aldehydes                  | Nonanal                      | Blue                  | Blue   | Blue | Blue   | Yellow            | Yellow | Yellow | Yellow |
| Benzenoid/phenylpropanoids | 2'-/4'-Hydroxyacetophenone   | Blue                  | Yellow | Blue | Yellow | Blue              | Blue   | Blue   | Blue   |
|                            | 2'-Methoxyacetophenone       | Blue                  | Blue   | Blue | Blue   | Yellow            | Yellow | Yellow | Yellow |
|                            | 3,5-Dimethoxytoluene         | Blue                  | Blue   | Blue | Blue   | Yellow            | Yellow | Yellow | Yellow |
|                            | $\beta$ -Phenethyl acetate   | Blue                  | Blue   | Blue | Blue   | Blue              | Blue   | Blue   | Blue   |
|                            | Acetophenone                 | Blue                  | Blue   | Blue | Blue   | Yellow            | Yellow | Yellow | Yellow |
|                            | Benzyl acetate               | Blue                  | Blue   | Blue | Blue   | Blue              | Blue   | Blue   | Blue   |
|                            | Ethyl benzoate               | Blue                  | Blue   | Blue | Blue   | Blue              | Blue   | Blue   | Blue   |
|                            | Methyl 3,5-dimethoxybenzoate | Blue                  | Blue   | Blue | Blue   | Yellow            | Yellow | Yellow | Yellow |
|                            | Methyl benzoate              | Blue                  | Blue   | Blue | Blue   | Yellow            | Yellow | Yellow | Yellow |
|                            | Monoterpenes                 | $\alpha$ -Terpinolene | Blue   | Blue | Blue   | Blue              | Blue   | Blue   | Blue   |
| $\beta$ -Ocimene           |                              | Blue                  | Blue   | Blue | Blue   | Yellow            | Yellow | Yellow | Yellow |
| Linalool                   |                              | Blue                  | Blue   | Blue | Blue   | Yellow            | Yellow | Yellow | Yellow |
| Sesquiterpenes             | $\alpha$ -Farnesene          | Blue                  | Blue   | Blue | Blue   | Yellow            | Yellow | Yellow | Yellow |

  

|          |              |
|----------|--------------|
| Detected | Non-detected |
|----------|--------------|

Figure 5. Constitutive scent profile of wild-type and transgenic *RNAi:AmLHY* snapdragons at four different time-points, denoted as ZT (zeitgeber time) 3, 9, 15 and 21. ZT0 represents the time of lights on and ZT12, lights off. We set minQuality to 80% (NormalizeWithinFiles function). Constitutive profile includes VOCs that were present on at least the 70% of analyzed samples. Volatiles are listed according to their class. Yellow indicates detected compounds and blue, non-detected compounds.

218 emission in a wild type plant may be grossly underestimated. While the constitutive  
 219 scent profile of the wild type is more complex than in the mutants, it is far simpler than  
 220 the *RNAi:AmLHY* plants. This phenotype was also noticeable analyzing the daily  
 221 emission of wild type and transgenic lines. The complexity of the constitutive and non-  
 222 constitutive profile by frequency was higher in *RNAi:AmLHY* flowers (Fig. 5,  
 223 Supplemental Fig. S2). Interestingly, we also found differences in time emission, as in  
 224 case of the monoterpene linalool, that was not detected at ZT9 and ZT15 in wild type  
 225 flowers but was constitutively emitted in all analyzed time points in transgenic  
 226 snapdragons (Fig. 5).  
 227 This suggests a general function of *DEF*, *CO* and *AmLHY* in establishing a concrete  
 228 aroma typical of *A.majus* flowers.

229

230 **Effect of floral organ identity mutants and *RNAi:AmLHY* on VOC biosynthetic**  
231 **pathways**

232 We identified compounds in snapdragon fragrance that are precursors of other volatiles,  
233 as benzaldehyde and its derivatives benzyl alcohol, benzyl acetate and methyl benzoate  
234 (Muhlemann et al., 2014). We found that, in general, snapdragon showed constitutive  
235 volatiles such as acetophenone, whereas other volatiles such as benzyl alcohol and  
236 methyl salicylate were present in the non-constitutive profile by frequency (Fig. 6).

237 Based on previous data, we plotted the schematic pathway of  
238 benzenoid/phenylpropanoids and terpenoids pathways (Fig. 6, Fig. 7), indicating which  
239 group of snapdragon flowers emitted or not a compound, and its frequency among the  
240 analysed population. These results suggest a preferred route: the volatiles benzaldehyde  
241 and benzyl alcohol were not found in the constitutive profile of any snapdragon group  
242 whereas methyl benzoate was constitutively emitted in wild-type, compacta and  
243 *RNAi:AmLHY* lines but not in *deficiens-nicotianoides (def-nic)* group.

244 On the other hand, the monoterpenes linalool, pinene, limonene, myrcene and ocimene  
245 share the substrate geranyl pyrophosphate (Fig. 7). Pinene, limonene and myrcene were  
246 not present in the constitutive profile of analysed plant groups whereas linalool showed  
247 a constitutive emission in wild-type and *RNAi:AmLHY* and ocimene, in all plants except  
248 in *def-nic* mutant group. Differences in the constitutive and non-constitutive profile may  
249 be useful for further analysis of transcription factors, enzymes and transporters involved  
250 in volatile emission.

251

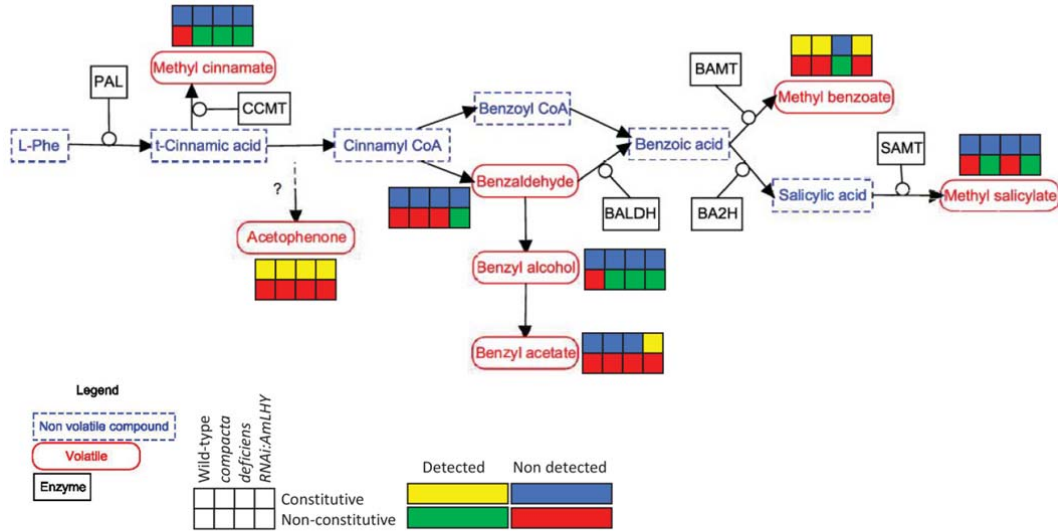

Figure 6. Benzenoid/phenylpropanoids schematic pathway. Detected and non-detected volatiles are shown as follow: first row refers to constitutive profiles and second row to non-constitutive by frequency profiles. Detected compounds in the constitutive and non-constitutive profiles are depicted by yellow and green, respectively. Non-detected compounds in the constitutive and non-constitutive profiles are indicated in blue and red, respectively. Each column represents a snapdragon group: wild-type (1st), *co* (2nd) and *def<sup>inc</sup>* (3rd) and transgenic lines *RNAi:AmlHY* (4th). PAL: phenylalanine ammonia lyase, CCMT: cinnamic acid carboxyl methyl transferase, BALDH: benzaldehyde dehydrogenase, BA2H: benzoic acid 2-hydroxylase, BAMT: benzoic acid carboxyl methyl transferase, SAMT: salicylic acid carboxyl methyl transferase.

## 252 Genotypes can be separated by Machine learning

253 Once we obtained a Constitutive Profile list of volatiles, we performed a classification  
 254 analysis using the Machine Learning algorithm Random Forest (Breiman, 2001). Our  
 255 data revealed that all snapdragon scent profiles were correctly classified (error out of  
 256 bag or OOB, 0%) (Table 1). The “randomForest” package also provides a rank list with  
 257 the accuracy in which a predictor, a volatile in our case, can be used for classification  
 258 (Table 2). Altogether, our results show that gcProfileMakeR gives as output classified  
 259 scent profiles that are sufficiently different to be separated by Machine Learning.  
 260 As sessile organisms, plants rely on their chemistry to deal with the many interactions  
 261 conditioning their survival (abiotic and biotic). That may be the reason why plant  
 262 volatile chemotypes are known for their variability with regard to composition and  
 263 relative abundance of VOCs (Junker et al., 2018). gcProfileMakeR should ease the task  
 264 to define constitutive and non-constitutive metabolomes in large datasets.

265



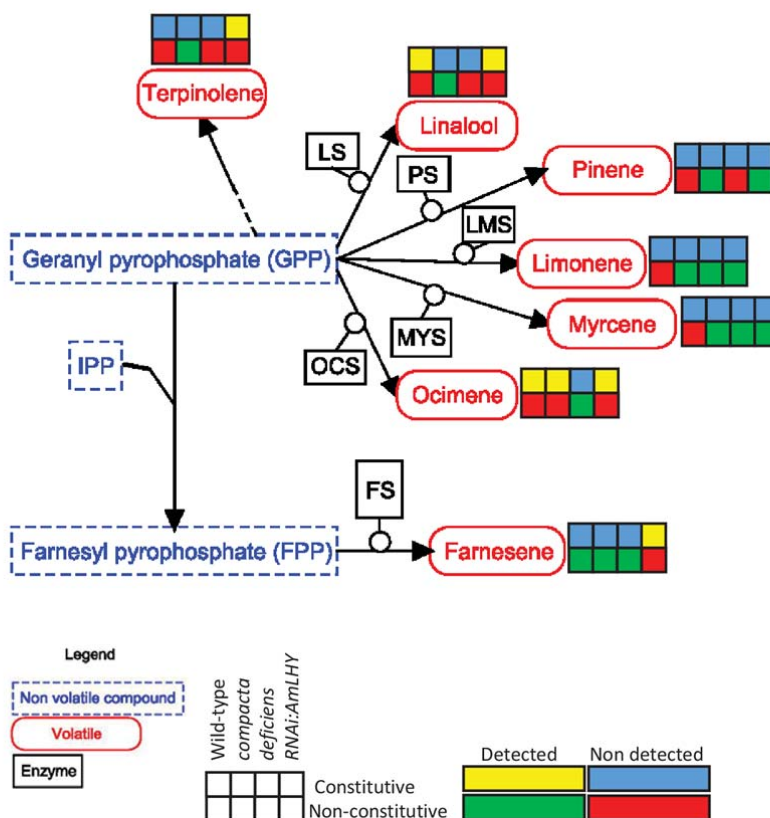

Figure 7. Terpenoids schematic pathway. Representations are like in Figure 6. LS: linalool synthase, PS: pinene synthase, LMS: limonene synthase, MYS: myrcene synthase, OCS: ocimene synthase, FS: farnesene synthase, IPP: isopentenyl diphosphate.

## 266 Materials and Methods

### 267 Plant material and VOCs analysis

268 We used flowers from *Antirrhinum majus compacta* (*co*) and *deficiens-nicotianoides*  
 269 (*def-nic*) mutants (Manchado-Rojo et al., 2012) and *RNAi:AmlHY* from three  
 270 independent transgenic lines (Terry et al., 2019b). *Antirrhinum* plants were grown in the  
 271 greenhouse as described previously, using standard methods (Weiss et al., 2016b). Scent  
 272 samples were analysed according to (Ruiz-Hernández et al., 2017). Samplings periods  
 273 of VOCs were 24 hours for *def-nic* and *co*, while WT and *RNAi:AmlHY* were sampled  
 274 every six hours for a complete day. The *RNAi:AmlHY* samples were aggregated to

275 compare to other genotypes. We analysed 16 biological replicas for wild type Sippe 50,  
276 35 for *co*, 9 for *def-nic* and 40 for *iRNA:AmLHY*.

277

## 278 **gcProfileMakeR**

279

280 gcProfileMakeR R package is available at git clone

281 [git@gitlab.atca.um.es:fernando.perez8/gcProfileMakeR.git](https://gitlab.atca.um.es/fernando.perez8/gcProfileMakeR.git).

282 Some packages are recommended to be pre-installed in R before gcProfileMakeR runs:

283 readxl, plyr, stringr, dplyr, tidyr, ggplot2 and egg.

284

## 285 **Machine Learning Analysis**

286 We used the random forest algorithm implemented in the R package “randomForest” ”

287 (Liaw and Wiener, 2002) (R version 3.6.1). We rearranged our data in a data frame

288 where the rows correspond to the samples from wild type, *co*, *defnic* mutants and

289 *RNAi:AmLHY* and the columns contain the value of the selected volatiles, expressed as

290 integrated peak area divided by the fresh weight. We used *randomForest* default

291 parameters, setting parameter “importance” as “TRUE” and obtaining a classification

292 random forest.

293

## 294 **Acknowledgments**

295

## 296 **Tables**

297 Table 1. Random forest confusion matrix. The total number of samples of each

298 snapdragon group is shown in parentheses (observed column). The number of

299 misclassified samples of each group are in columns (predicted columns). The class.error  
300 column indicates the percentage of misclassified samples (1-[(total correct  
301 predictions/total predictions) x 100]).

| Observed               | Predicted       |                  |                   |           | class.error |
|------------------------|-----------------|------------------|-------------------|-----------|-------------|
|                        | <i>compacta</i> | <i>deficiens</i> | <i>RNAi:AmLHY</i> | Wild type |             |
| <i>compacta</i> (35)   | 35              | 0                | 0                 | 0         | 0           |
| <i>deficiens</i> (9)   | 0               | 9                | 0                 | 0         | 0           |
| <i>RNAi:AmLHY</i> (10) | 0               | 0                | 10                | 0         | 0           |
| Wild type (4)          | 0               | 0                | 0                 | 4         | 0           |

302

303

304 Table 2. Importance ranking of volatile organic compounds among *Antirrhinum majus*  
305 groups (wild-type, *compacta* mutant, *deficiens* mutant and *RNAi:AmLHY*) using random  
306 forest algorithm. The NIST library identifies two pairs of similar compounds which  
307 share the same retention time, 2'-Hydroxyacetophenone and 4'-Hydroxyacetophenone,  
308 and 2'-Methoxyacetophenone and 4'-Methoxyacetophenone, respectively. These  
309 compounds are depicted with a slash (“/”) in the table. Volatiles are ranked based on  
310 mean decrease in accuracy (MDA). This value indicates the accuracy in which a volatile  
311 can be used for classification.

| Volatile                     | MDA   |
|------------------------------|-------|
| Nonanal                      | 16.26 |
| Farnesene                    | 14.8  |
| Methyl 2-methylbutyrate      | 14.65 |
| 3,5-Dimethoxytoluene         | 14.44 |
| Methyl benzoate              | 12.66 |
| Acetophenone                 | 10.96 |
| Phenethyl acetate            | 9.57  |
| Methyl 3,5-dimethoxybenzoate | 9.26  |
| Ocimene                      | 6.52  |
| Linalool                     | 5.99  |
| Decanal                      | 5.54  |
| 2'-/4'-Hydroxyacetophenone   | 5.04  |
| 2'-/4'-Methoxyacetophenone   | 4.93  |
| Terpinolene                  | 3.75  |
| Ethyl benzoate               | 1.42  |
| Benzyl acetate               | 0     |

312

313

## 314 Figure Legends

315 **Figure 1.** (A) gcProfileMakeR pipeline. This library accepts Excel (.xls) and .csv files  
316 as input data. The first function, NormalizeWithinFiles, reads the data and groups  
317 compounds with similar retention time (RT) and common CAS numbers. Users also can  
318 apply two filters: cas2rm (compound/s to exclude) and minQuality (minimum quality).  
319 NormalizeBetweenFiles groups compounds with similar RT in all files, with the most  
320 representative CAS number. getGroups determines the constitutive and non-constitutive  
321 profiles (i.e. metabolic profile) by frequency and quality, which are choose by the user.  
322 Finally, plotGroup creates a graphic the constitutive, non-constitutive by frequency  
323 and/or non-constitutive profile by quality. (B) A standard chromatogram where two  
324 close peaks are integrated separately by default and dataset corresponding to peaks,  
325 where the identity with highest probability of the peaks is the same, methyl benzoate  
326 (CAS number 93-58-3). (C) Mass spectra of methyl jasmonate(CAS No: 39924-52-2), a  
327 commercial standard (upper panel) and mass spectral database (lower panel)Willey10th-  
328 NIST11b.

329

330 **Figure 2.** plotGroup function. This graph shows the constitutive profile by frequency of  
331 the wild-type snapdragon at ZT3 (*Zeitgeber* time). The x-axis shows the CAS number  
332 of volatile organic compounds. The upper part displays the average quality of volatiles  
333 (red line) and the lower part of the graph indicates the average areas of compounds  
334 (blue bars), that are plotted in decreasing order.

335

336 **Figure 3.** Heat map of constitutive by frequency scent profile of wild-type snapdragon  
337 (SIPPE50), the mutants *compacta* and *deficiens-nicotianoides* and the transgenic line  
338 RNAi:AmLHY. We set minQuality to 80% (NormalizeWithinFiles function).

339 Constitutive profile comprises those compounds that were present on at least the 70% of  
340 analyzed samples. Volatile compounds are clustered by class. Yellow and blue colors  
341 denote a detected and a non-detected compound, respectively.

342

343 Figure 4. Heat map of non-constitutive by frequency scent profiles of wild-type  
344 snapdragon (Sippe 50, WT), the mutants *co* and *def<sup>mic</sup>* and the transgenic line  
345 *RNAi:AmLHY (RNAi)*. We set minQuality to 80% (NormalizeWithinFiles function).  
346 Non-constitutive profile comprises those compounds that were present on or less than  
347 the 30% of analyzed samples. Volatile compounds are clustered by class. Green and red  
348 colors indicate a detected and a non-detected compound, respectively.

349

350 **Figure 5.** Constitutive scent profile of wild-type and transgenic *RNAi:AmLHY*  
351 snapdragons at four different time-points, denoted as ZT (*zeitgeber* time) 3, 9, 15 and  
352 21. ZT0 represents the time of lights on and ZT12, lights off. We set minQuality to  
353 80% (NormalizeWithinFiles function). Constitutive profile includes VOCs that were  
354 present on at least the 70% of analyzed samples. Volatiles are listed according to their  
355 class. Yellow indicates detected compounds and blue, non-detected compounds.

356

357 **Figure 6.** Benzenoid/phenylpropanoids schematic pathway. Detected and non-detected  
358 volatiles are shown as follow: first row refers to constitutive profiles and second row to  
359 non-constitutive by frequency profiles. Detected compounds in the constitutive and non-  
360 constitutive profiles are depicted by yellow and green, respectively. Non-detected  
361 compounds in the constitutive and non-constitutive profiles are indicated in blue and  
362 red, respectively. Each column represents a snapdragon group: wild-type (1<sup>st</sup>), *co* (2<sup>nd</sup>)  
363 and *def<sup>mic</sup>* (3<sup>rd</sup>) and transgenic lines *RNAi:AmLHY* (4<sup>th</sup>). PAL: phenylalanine ammonia

364 lyase, CCMT: cinnamic acid carboxyl methyl transferase, BALDH: benzaldehyde  
365 dehydrogenase, BA2H: benzoic acid 2-hydroxylase, BAMT: benzoic acid carboxyl  
366 methyl transferase, SAMT: salicylic acid carboxyl methyl transferase.

367

368 **Figure 7.** Terpenoids schematic pathway. Representations are like in Figure 6. LS:  
369 linalool synthase, PS: pinene synthase, LMS: limonene synthase, MYS: myrcene  
370 synthase, OCS: ocimene synthase, FS: farnesene synthase, IPP: isopentenyl  
371 diphosphate.

372

## Parsed Citations

- Bey M, Stuber K, Fellenberg K, Schwarz-Sommer Z, Sommer H, Saedler H, Zachgo S (2004) Characterization of Antirrhinum petal development and identification of target genes of the class B MADS box gene DEFICIENS. Plant Cell 16: 3197–3215**  
Pubmed: [Author and Title](#)  
Google Scholar: [Author Only Title Only Author and Title](#)
- Breiman L (2001) Random Forests. Machine Learning 45: 5–32**  
Pubmed: [Author and Title](#)  
Google Scholar: [Author Only Title Only Author and Title](#)
- Cna'ani A, Mühlemann JK, Ravid J, Masci T, Klempien A, Nguyen TTH, Dudareva N, Pichersky E, Vainstein A (2014) Petunia x hybrida floral scent production is negatively affected by high-temperature growth conditions. Plant, cell & environment. doi: 10.1111/pce.12486**  
Pubmed: [Author and Title](#)  
Google Scholar: [Author Only Title Only Author and Title](#)
- Groen SC, Jiang S, Murphy AM, Cunniffe NJ, Westwood JH, Davey MP, Bruce TJA, Caulfield JC, Furzer OJ, Reed A, et al (2016) Virus Infection of Plants Alters Pollinator Preference: A Payback for Susceptible Hosts? PLOS Pathogens 12: e1005790**
- Junker RR, Kuppler J, Amo L, Blande JD, Borges RM, Dam NM van, Dicke M, Dötterl S, Ehlers BK, Etl F, et al (2018) Covariation and phenotypic integration in chemical communication displays: biosynthetic constraints and eco-evolutionary implications. New Phytologist 220: 739–749**  
Pubmed: [Author and Title](#)  
Google Scholar: [Author Only Title Only Author and Title](#)
- Kessler A, Baldwin IT (2002) Plant responses to insect herbivory: the emerging molecular analysis. Annual Review of Plant Biology 53: 299–328**  
Pubmed: [Author and Title](#)  
Google Scholar: [Author Only Title Only Author and Title](#)
- Knudsen JT, Eriksson R, Gershenzon J, Ståhl B, Stahl B (2006) Diversity and distribution of floral scent. Botanical Review 72: 1–120**  
Pubmed: [Author and Title](#)  
Google Scholar: [Author Only Title Only Author and Title](#)
- Kolosova N, Gorenstein N, Kish CM, Dudareva N (2001) Regulation of circadian methyl benzoate emission in diurnally and nocturnally emitting plants. Plant Cell 13: 2333–2347**  
Pubmed: [Author and Title](#)  
Google Scholar: [Author Only Title Only Author and Title](#)
- Liaw A, Wiener M (2002) Classification and regression by randomForest. R news 2: 18–22**  
Pubmed: [Author and Title](#)  
Google Scholar: [Author Only Title Only Author and Title](#)
- Manchado-Rojo M, Delgado-Benarroch L, Roca MJ, Weiss J, Egea-Cortines M (2012) Quantitative levels of Deficiens and Globosa during late petal development show a complex transcriptional network topology of B function. The Plant journal : for cell and molecular biology 72: 294–307**  
Pubmed: [Author and Title](#)  
Google Scholar: [Author Only Title Only Author and Title](#)
- Muhlemann JK, Klempien A, Dudareva N (2014) Floral volatiles: from biosynthesis to function. Plant, cell & environment 37: 1936–49**  
Pubmed: [Author and Title](#)  
Google Scholar: [Author Only Title Only Author and Title](#)
- Raguso RA, Schlumpberger BO, Kaczorowski RL, Holtsford TP (2006) Phylogenetic fragrance patterns in Nicotiana sections Alatae and Suaveolentes. Phytochemistry 67: 1931–1942**  
Pubmed: [Author and Title](#)  
Google Scholar: [Author Only Title Only Author and Title](#)
- Ruiz-Hernández Victoria, Hermans Benjamin, Weiss Julia, Egea-Cortines Marcos (2017) Genetic analysis of natural variation in Antirrhinum scent profiles identifies BENZOIC ACID CARBOXYMETHYL TRANSFERASE as the major locus controlling methyl benzoate synthesis. Frontiers in plant science 8: 27–40**  
Pubmed: [Author and Title](#)  
Google Scholar: [Author Only Title Only Author and Title](#)
- Shimoda T, Nishihara M, Ozawa R, Takabayashi J, Arimura GI (2012) The effect of genetically enriched (E)- $\beta$ -ocimene and the role of floral scent in the attraction of the predatory mite Phytoseiulus persimilis to spider mite-induced volatile blends of torenia. New Phytologist 193: 1009–1021**  
Pubmed: [Author and Title](#)  
Google Scholar: [Author Only Title Only Author and Title](#)
- Sommer H, Beltran JP, Huijser P, Pape H, Lonngig WE, Saedler H, Schwarz-Sommer Z, Schwarzsommer Z, Beltrán JP, Huijser P, et al (1990) Deficiens, a Homeotic Gene Involved in the Control of Flower Morphogenesis in Antirrhinum-Majus - the Protein Shows Homology to Transcription Factors. EMBO Journal 9: 605–613**  
Pubmed: [Author and Title](#)



Google Scholar: [Author Only](#) [Title Only](#) [Author and Title](#)

**Sommer H, Nacken W, Beltran P, Huijser P, Pape H, Hansen G, Flor P, Saedler H, Schwarz-Sommer Z, Hansen R, et al (1991) Properties of Deficiens, a Homeotic Gene Involved in the Control of Flower Morphogenesis in Antirrhinum-Majus. Development Supplement 1: 169–175**

Pubmed: [Author and Title](#)

Google Scholar: [Author Only](#) [Title Only](#) [Author and Title](#)

**Terry MI, Pérez-Sanz F, Díaz-Galián MV, Pérez de los Cobos F, Navarro PJ, Egea-Cortines M, Weiss J (2019a) The Petunia CHANEL Gene is a ZEITLUPE Ortholog Coordinating Growth and Scent Profiles. Cells 8: 343**

Pubmed: [Author and Title](#)

Google Scholar: [Author Only](#) [Title Only](#) [Author and Title](#)

**Terry MI, Pérez-Sanz F, Navarro PJ, Weiss J, Egea-Cortines M (2019b) The Snapdragon LATE ELONGATED HYPOCOTYL Plays A Dual Role in Activating Floral Growth and Scent Emission. Cells 8: 920**

Pubmed: [Author and Title](#)

Google Scholar: [Author Only](#) [Title Only](#) [Author and Title](#)

**Weiss J, Mühlemann JK, Ruiz-Hernández V, Dudareva N, Egea-Cortines M (2016a) Phenotypic space and variation of floral scent profiles during late flower development in Antirrhinum. Frontiers in plant science 7: 1903**

Pubmed: [Author and Title](#)

Google Scholar: [Author Only](#) [Title Only](#) [Author and Title](#)

**Weiss Julia, Alcantud-Rodriguez Raquel, Toksöz Tugba, Egea-Cortines M (2016b) Meristem maintenance, auxin, jasmonic and abscisic acid pathways as a mechanism for phenotypic plasticity in Antirrhinum majus. Scientific reports 6: 2–11**

Pubmed: [Author and Title](#)

Google Scholar: [Author Only](#) [Title Only](#) [Author and Title](#)

**Wilkinson MD, Dumontier M, Aalbersberg IJ, Appleton G, Axton M, Baak A, Blomberg N, Boiten J-W, da Silva Santos LB, Bourne PE, et al (2016) The FAIR Guiding Principles for scientific data management and stewardship. Scientific Data 3: 160018**

Pubmed: [Author and Title](#)

Google Scholar: [Author Only](#) [Title Only](#) [Author and Title](#)

**Zhu G, Wang S, Huang Z, Zhang S, Liao Q, Zhang C, Lin T, Qin M, Peng M, Yang C, et al (2018) Rewiring of the Fruit Metabolome in Tomato Breeding. Cell 172: 249-261.e12**

Pubmed: [Author and Title](#)

Google Scholar: [Author Only](#) [Title Only](#) [Author and Title](#)
